# Supplementary material for: Multispectral upconversion nanoparticles for near infrared encoding of wearable devices
Source: Royal Society of Chemistry journal article supplement (doi:10.1039/d1ra03572j), 2021-01-01
Supplement: d1ra03572j1.pdf [file d1ra03572j1.pdf]

Electronic Supplementary Information (ESI)

**Multispectral Upconversion Nanoparticles  
for Near Infrared Encoding of Wearable Devices**

Gibum Lee,<sup>‡</sup> Jonghwan Mun,<sup>‡</sup> Hyunsik Choi, Seulgi Han, Sei Kwang Hahn \*

a Department of Materials Science and Engineering, Pohang University of Science and Technology  
(POSTECH), 77 Cheongam-ro, Nam-gu, Pohang, Gyeongbuk 37673, Korea

**\*Corresponding author:**

Tel.: +82 54 279 2159. Fax: +82 54 279 2399. E-mail: skhanb@postech.ac.kr (S.K. Hahn)

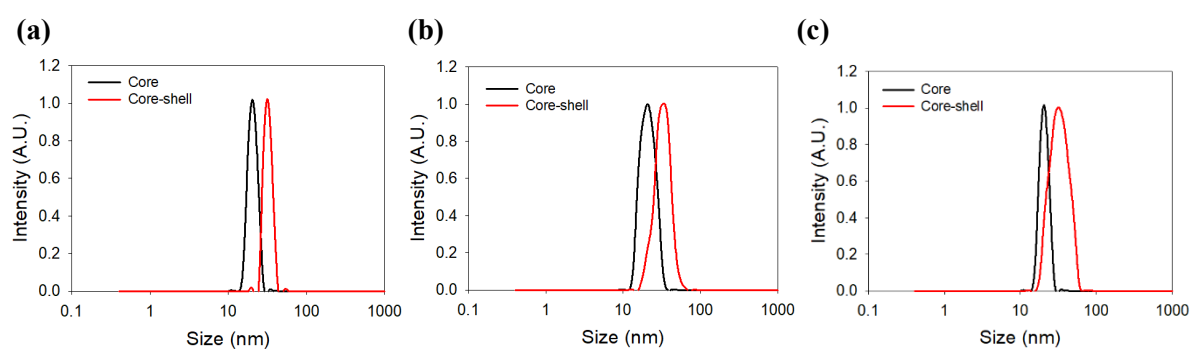

**Figure S1.** Dynamic light scattering analysis for the particle size of (a) rUCNPs, (b) gUCNPs, and (c) bUCNPs.

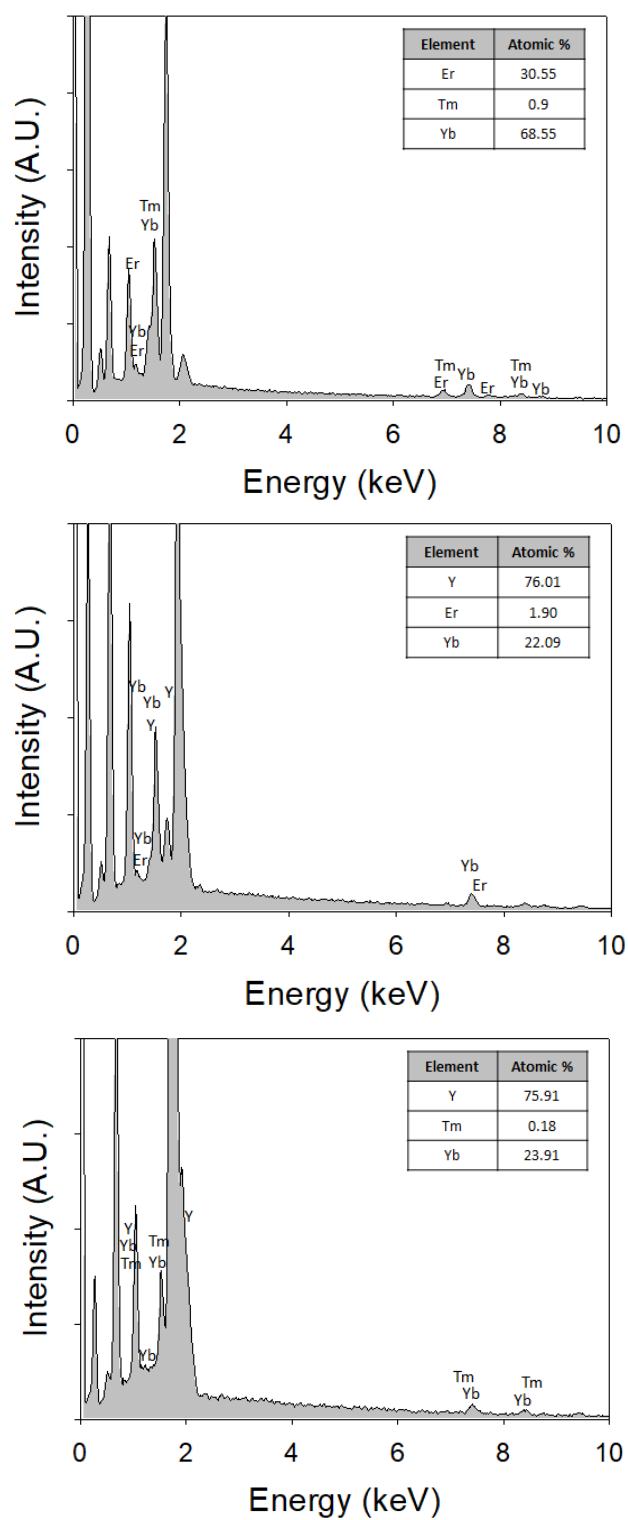

**Figure S2.** EDS spectra of (a) rUCNPs (b) gUCNPs and (c) bUCNPs.

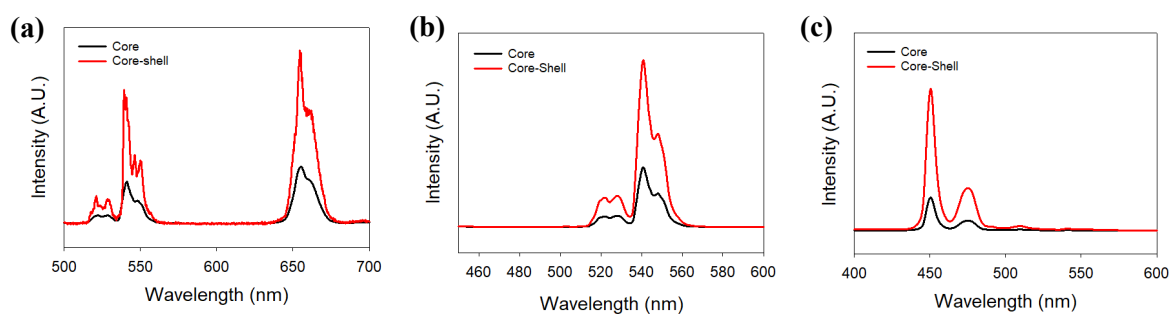

**Figure S3.** The photoluminescence intensity of core and core-shell (a) rUCNPs, (b) gUCNPs and (c) bUCNPs.

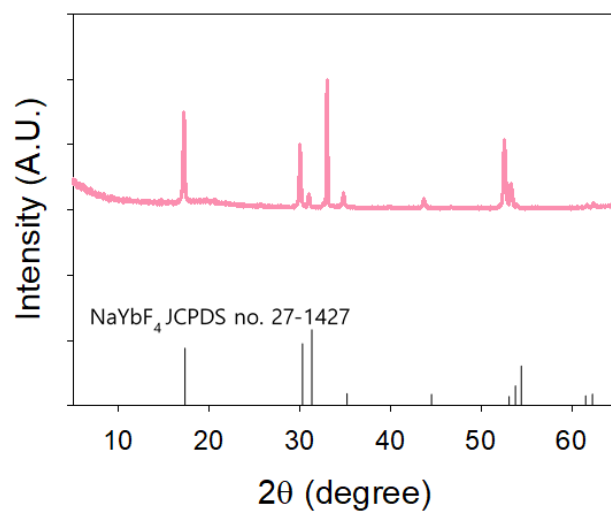

**Figure S4.** XRD patterns of the NaYbF<sub>4</sub>:Er,Tm.
